# Supplementary material
Source: Research Square preprint supplement (doi:10.21203/rs.3.rs-9884228/v1)
Supplement: Supplementary file 1 [file 95f0f4d663577a553b376d88.docx]

# Appendix1

| Constructs | Category | Keywords |
| --- | --- | --- |
| Intent | Goal Specificity | Goals, objectives, direction, purpose, mission, plans, schemes, arrangements, blueprints, will, intend, plan to, expect, strive, work hard, go all out, ensure achievement, dedicate, ensure, guarantee, must, resolutely achieve, lock in |
| Intent | Challenge | Leading, top, head, first tier, industry benchmark, first, top, champion, top 1, one of the best, disrupt, reconstruct, revolutionary change, break the pattern, rewrite the rules, breakthrough, leap, overcome, achieve qualitative change, reshape, reinvent, redefine, comprehensive upgrade, paradigm innovation, lead, drive, open up new situations, set an example, become a benchmark, create a benchmark, set a model, build a demonstration, strive to be a model |
| Intent | Time Anchoring | Within three years, the next three years, short term, within the year, this year, in the near future, immediately, the next five years, medium to long term, long-term goals, strategic cycle, within the medium-term planning period |
| Cognition | Causal Logic | Because, due to, in view of, stem from, attribute to, so, therefore, hence, thus, it can be seen that, lead to, cause, result in, bring about, thereby, further, finally, thereby, deduce |
| Cognition | Systems Thinking | Ecology, ecosystem, ecological circle, ecological synergy, ecological co-construction, synergy, linkage, integration, coupling, integration, closed loop, feedback loop, end to end, self-cycling, self-optimizing, underlying logic, fundamental mechanism, inherent law, first principle, essential structure, structural, systemic, global, deep-seated, non-accidental |
| Cognition | Risk Depth | Paradigm shift, technological paradigm change, industrial revolution, generational change, structural change, institutional change, policy reconstruction, regulatory transformation, governance system upgrade, legitimacy reshaping, technological disruption, technological substitution, innovation shock, black swan technology, discontinuous innovation, long-term recession, structural decline, irreversible shrinkage, demand collapse, value collapse, legitimacy crisis, social questioning, regulatory crackdown, public opinion pressure, ESG risk |
| Imagination | Future Orientation & Openness | Explore, try, conceive, look forward, plan, plan, look to the future, long-term consideration, open up, develop, new path, new model, new format, new direction, new possibility, new opportunity, potential market, blue ocean, forward-looking, look to the future, future business, future opportunity, plan ahead, position for the future, cultivate new growth points |
| Imagination | Cross-boundary Integration & System Reconstruction | Intelligence+, digital+, Internet+, AI+, phantomization, ecologization, empowerment, connector, integration, collaborative innovation, industrial synergy, cross-border cooperation, open ecology, infrastructure, value network, system integration, integrated innovation, reconstruct value chain, value flywheel, growth engine |
| Learning | Single-loop Learning | Optimize, tune, refine, improve efficiency, reduce costs, improve, perfect, correct, fine-tune, iterative upgrade, improve efficiency, improve effectiveness, accelerate processes, reduce waste, lean management, refine, refine granularity, precise policy, detail control, cost reduction and efficiency increase, cost control, maximize benefits, optimize input-output ratio |
| Learning | Double-loop Learning | Reflect, review, examine, think deeply, self-criticism, redefine, reconstruct cognition, refresh understanding, paradigm reset, underlying reset, paradigm shift, model switch, strategic transformation, fundamental change, discontinuous leap, learn from failure, learn lessons, failure review, grow in adversity, turn crisis into opportunity, fundamental change, thorough reform, break the old and establish the new, disruptive adjustment, system reset |
| Learning | Organizational Reflection | Review, retrospective summary, experience extraction, gain and loss analysis, process audit, summarize lessons, summarize laws, avoid repeating mistakes, build firewalls, adjust direction, strategic correction, route correction, shift focus, refocus, correct, calibrate, align goals, return to original intention, correct deviations, iterate, rapid trial and error, small steps fast run, continuous evolution, agile update |
| Action | Resource Investment & Capital Allocation | Invest, invest, build, construct, establish, set up, purchase, purchase, expand, technical renovation, inject capital, finance, raise funds, budget, allocate, allocate, deploy, spend, acquire, merge |
| Action | Strategic Implementation & Organizational Change | R&D, develop, innovate, transform, upgrade, renovate, restructure, integrate, merge, reform, restructure, implement, implement, carry out, carry out, launch, launch, publish, sign, introduce, plan, apply, use, promote, pilot, create, establish, found, develop, expand, extend, consolidate, consolidate, implement, achieve, achieve, complete, advance, deepen, strengthen, accelerate |

**Note:** The original keywords were extracted from Chinese annual reports. This English version is provided for editorial review and international readability.
